# Supplementary material
Source: Springer Nature journal article supplement (https://www.springermedizin.de/resource/supplementary/12931_2013_1507_MOESM3_ESM.pdf/9426356)

Wild type

Rac2<sup>-/-</sup>

Saline

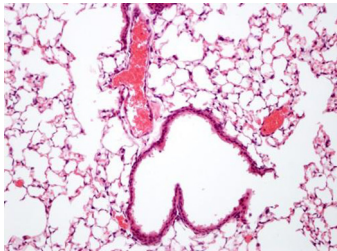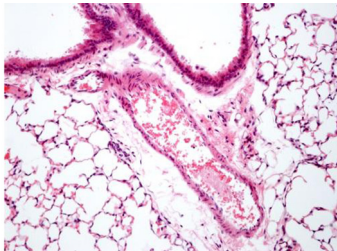

BLM

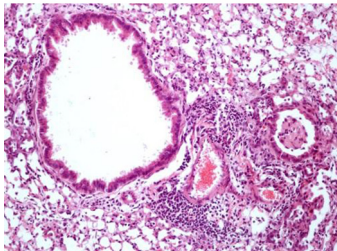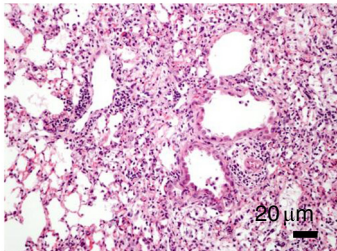

20 μm

Supplement: MOESM3 [file 9426356]
